# Supplementary material for: Bayesian determination of the effect of a deep eutectic solvent on the structure of lipid monolayers
Source: Royal Society of Chemistry journal article supplement (doi:10.1039/c9cp00203k), 2019-01-01
Supplement: c9cp00203k1.pdf [file c9cp00203k1.pdf]

SI for “Bayesian determination of the effect of a deep eutectic solvent on the  
structure of lipid monolayers”

A. R. McCluskey,<sup>1,2,\*</sup> A. Sanchez-Fernandez,<sup>1,3,†</sup> K. J. Edler,<sup>1</sup>  
S. C. Parker,<sup>1</sup> A. J. Jackson,<sup>3,4</sup> R. A. Campbell,<sup>5,6</sup> and T. Arnold<sup>1,2,3,7,‡</sup>  
<sup>1</sup>*Department of Chemistry, University of Bath, Claverton Down, Bath, BA2 7AY, UK*  
<sup>2</sup>*Diamond Light Source, Harwell Campus, Didcot, OX11 0DE, UK*  
<sup>3</sup>*European Spallation Source, SE-211 00 Lund, Sweden*  
<sup>4</sup>*Department of Physical Chemistry, Lund University, SE-211 00 Lund, Sweden*  
<sup>5</sup>*Division of Pharmacy and Optometry, University of Manchester, Manchester, UK*  
<sup>6</sup>*Institut Laue-Langevin, 71 avenue des Martyrs, 38000, Grenoble, France*  
<sup>7</sup>*ISIS Neutron and Muon Source, Science and Technology Facilities Council,  
Rutherford Appleton Laboratory, Harwell Oxford, Didcot, OX11 0QX, UK*  
(Dated: February 19, 2019)

---

\* A.R.M. and A.S.-F. contributed equally to this work; a.r.mccluskey@bath.ac.uk/andrew.mccluskey@diamond.ac.uk

† A.R.M. and A.S.-F. contributed equally to this work; Present address: Department of Food Technology, Lund University, SE-211 00 Lund, Sweden.

‡ tom.arnold@ess.se

TABLE SI. The best-fit values, and associated 95 % confidence intervals for the varying parameters in the XRR models, at the highest surface pressure (SP) measured. The values for  $\phi_h$  were obtained from the use of Eqn. 2

| Lipid<br>SP/mNm <sup>-1</sup> | DLPC<br>30              | DMPC<br>30        | DPPC<br>25               | DMPG<br>25               |
|-------------------------------|-------------------------|-------------------|--------------------------|--------------------------|
| $\sigma_{t,h,s}/\text{\AA}$   | $4.35 \pm 0.02$         | $4.53 \pm 0.01$   | $4.90 \pm 0.00$          | $4.44 \pm 0.01$          |
| $d_t/\text{\AA}$              | $10.31^{+0.04}_{-0.04}$ | $13.82 \pm 0.01$  | $16.91 \pm 0.01$         | $13.99^{+0.01}_{-0.01}$  |
| $V_t/\text{\AA}^3$            | $624.92 \pm 3.51$       | $718.76 \pm 0.52$ | $765.29^{+0.37}_{-0.38}$ | $734.01 \pm 0.62$        |
| $V_h/\text{\AA}^3$            | $331.48 \pm 0.58$       | $339.55 \pm 0.28$ | $322.01 \pm 0.24$        | $329.95^{+0.32}_{-0.33}$ |
| $d_h/\text{\AA}$              | $10.98^{+0.13}_{-0.12}$ | $13.21 \pm 0.04$  | $12.69 \pm 0.03$         | $13.95 \pm 0.04$         |
| $\phi_h/\times 10^{-2}$       | $50.22^{+1.13}_{-1.03}$ | $50.57 \pm 0.24$  | $43.94 \pm 0.22$         | $54.92 \pm 0.20$         |

This Supplementary Information document is only a part of a fully reproducible analysis workflow. The complete workflow, along with all datasets, figure files, and analysis/plotting scripts is available at [https://github.com/arm61/lipids\\_at\\_airdes](https://github.com/arm61/lipids_at_airdes) (DOI: 10.5281/zenodo.2538002) under a CC BY-SA 4.0 license.

### S1. XRR PARAMETERS AT EACH SURFACE PRESSURE

Tables SI-SIV give the best fit values for the custom model that were fitted to each surface pressure, for each lipid. These values were used for comparison to assess the effect of the choline chloride:glycerol on the lipid.

### S2. NEUTRON REFLECTOMETRY AND SLD PROFILES

Figure 3 shows the neutron reflectometry and scattering length density profiles for DMPC at 25 mNm<sup>-1</sup> (two contrasts) and DPPC at 15 mNm<sup>-1</sup> (two contrasts).

### S3. GRAZING INCIDENT X-RAY DIFFRACTION (GIXD)

The surface pressure was measured using an Aluminium Wilhelmy plate because the standard paper plates did not wet properly. This method did allow us to measure Langmuir isotherms, but these were inconsistent and as such, not a reliable method for determining the phase of the lipid monolayers. Instead we were able to measure GIXD for DPPC and DMPC over a range of different surface pressures and temperatures and representative data from these measurements are shown in Figure S2 for 30 mNm<sup>-1</sup> and 22 °C (and 7 °C for DMPC). Unfortunately, despite our best efforts, the quality of GIXD data obtained was not entirely satisfactory. All of data contains a weak artefact which we believe is due to scattering from the Teflon trough, which is probably due to the relatively low meniscus of the DES (due to its low surface tension compared to water). In addition we cannot see the expected (1,1) peak observed for these lipids on water. It is unclear whether this is because these peaks are absent or too weak to be measured. Nonetheless, Figure S2 shows clear diffraction peaks (which we assume to be the (2, 0)) for DPPC at 22 °C and for DMPC at 7 °C. These peaks are also visible at lower surface pressures (data not shown). The presence of any diffraction feature indicates the presence of an LC phase at these temperatures. Importantly there is no such peak observed for DMPC at 22 °C (see Figure S2), indicating that DMPC is in the LE phase at this temperature. The position of the (2,0) peak, approx 1.48 Å<sup>-1</sup>, is similar to that found under the same conditions in water [1]. We therefore assume that the phase behaviour on the DES is similar to that observed on water and that the phases observed at 30 mNm<sup>-1</sup> are the same as the other surface pressures measured with XRR and NR. While we have no direct evidence, we have extended this assumption to DLPC and DMPG since there is no reason to believe that the phases of these molecules should be different from that observed for DMPC.

### S4. PROBABILITY DISTRIBUTION FUNCTIONS

The two-dimensional probability distribution functions (PDFs) for all parameters and all lipids from the X-ray reflectometry models are given in Figures S3-S17. The two-dimensional probability distribution functions (PDFs) for all parameters and all lipids from the neutron reflectometry models are given in Figures S18-S21.

TABLE SII. The best-fit values, and associated 95 % confidence intervals for the varying parameters in the XRR models, at the second highest surface pressure (SP) measured. The values for  $\phi_h$  were obtained from the use of Eqn. 2

| Lipid<br>SP/mNm <sup>-1</sup> | DLPC<br>30              | DMPC<br>30        | DPPC<br>25               | DMPG<br>25               |
|-------------------------------|-------------------------|-------------------|--------------------------|--------------------------|
| $\sigma_{t,h,s}/\text{\AA}$   | $4.17 \pm 0.02$         | $3.86 \pm 0.00$   | $4.31 \pm 0.00$          | $3.81 \pm 0.00$          |
| $d_t/\text{\AA}$              | $9.52^{+0.03}_{-0.04}$  | $13.72 \pm 0.01$  | $16.83^{+0.01}_{-0.01}$  | $12.24^{+0.01}_{-0.01}$  |
| $V_t/\text{\AA}^3$            | $624.92 \pm 3.51$       | $718.76 \pm 0.52$ | $765.29^{+0.37}_{-0.38}$ | $734.01 \pm 0.62$        |
| $V_h/\text{\AA}^3$            | $331.48 \pm 0.58$       | $339.55 \pm 0.28$ | $322.01 \pm 0.24$        | $329.95^{+0.32}_{-0.33}$ |
| $d_h/\text{\AA}$              | $10.98^{+0.13}_{-0.12}$ | $13.21 \pm 0.04$  | $12.69 \pm 0.03$         | $13.95 \pm 0.04$         |
| $\phi_h/\times 10^{-2}$       | $54.03^{+1.04}_{-0.95}$ | $50.93 \pm 0.23$  | $44.22 \pm 0.22$         | $60.57 \pm 0.17$         |

TABLE SIII. The best-fit values, and associated 95 % confidence intervals for the varying parameters in the XRR models, at the second lowest surface pressure (SP) measured. The values for  $\phi_h$  were obtained from the use of Eqn. 2

| Lipid<br>SP/mNm <sup>-1</sup> | DLPC<br>25              | DMPC<br>25        | DPPC<br>20               | DMPG<br>20               |
|-------------------------------|-------------------------|-------------------|--------------------------|--------------------------|
| $\sigma_{t,h,s}/\text{\AA}$   | $4.36 \pm 0.02$         | $3.92 \pm 0.01$   | $4.09 \pm 0.00$          | $3.94 \pm 0.01$          |
| $d_t/\text{\AA}$              | $8.30 \pm 0.04$         | $12.12 \pm 0.01$  | $16.57 \pm 0.01$         | $10.64^{+0.01}_{-0.01}$  |
| $V_t/\text{\AA}^3$            | $624.92 \pm 3.51$       | $718.76 \pm 0.52$ | $765.29^{+0.37}_{-0.38}$ | $734.01 \pm 0.62$        |
| $V_h/\text{\AA}^3$            | $331.48 \pm 0.58$       | $339.55 \pm 0.28$ | $322.01 \pm 0.24$        | $329.95^{+0.32}_{-0.33}$ |
| $d_h/\text{\AA}$              | $10.98^{+0.13}_{-0.12}$ | $13.21 \pm 0.04$  | $12.69 \pm 0.03$         | $13.95 \pm 0.04$         |
| $\phi_h/\times 10^{-2}$       | $59.92^{+0.92}_{-0.84}$ | $56.66 \pm 0.20$  | $45.06 \pm 0.22$         | $65.72 \pm 0.15$         |

TABLE SIV. The best-fit values, and associated 95 % confidence intervals for the varying parameters in the XRR models, at the lowest surface pressure (SP) measured. The values for  $\phi_h$  were obtained from the use of Eqn. 2

| Lipid<br>SP/mNm <sup>-1</sup> | DLPC<br>20              | DMPC<br>20        | DPPC<br>15               | DMPG<br>15               |
|-------------------------------|-------------------------|-------------------|--------------------------|--------------------------|
| $\sigma_{t,h,s}/\text{\AA}$   | $4.23^{+0.02}_{-0.02}$  | $4.20 \pm 0.01$   | $3.88 \pm 0.00$          | $4.65 \pm 0.01$          |
| $d_t/\text{\AA}$              | $6.96 \pm 0.03$         | $9.39 \pm 0.01$   | $15.95 \pm 0.01$         | $5.71 \pm 0.05$          |
| $V_t/\text{\AA}^3$            | $624.92 \pm 3.51$       | $718.76 \pm 0.52$ | $765.29^{+0.37}_{-0.38}$ | $734.01 \pm 0.62$        |
| $V_h/\text{\AA}^3$            | $331.48 \pm 0.58$       | $339.55 \pm 0.28$ | $322.01 \pm 0.24$        | $329.95^{+0.32}_{-0.33}$ |
| $d_h/\text{\AA}$              | $10.98^{+0.13}_{-0.12}$ | $13.21 \pm 0.04$  | $12.69 \pm 0.03$         | $13.95 \pm 0.04$         |
| $\phi_h/\times 10^{-2}$       | $66.42^{+0.73}_{-0.66}$ | $66.41 \pm 0.16$  | $47.13 \pm 0.21$         | $81.62 \pm 0.18$         |

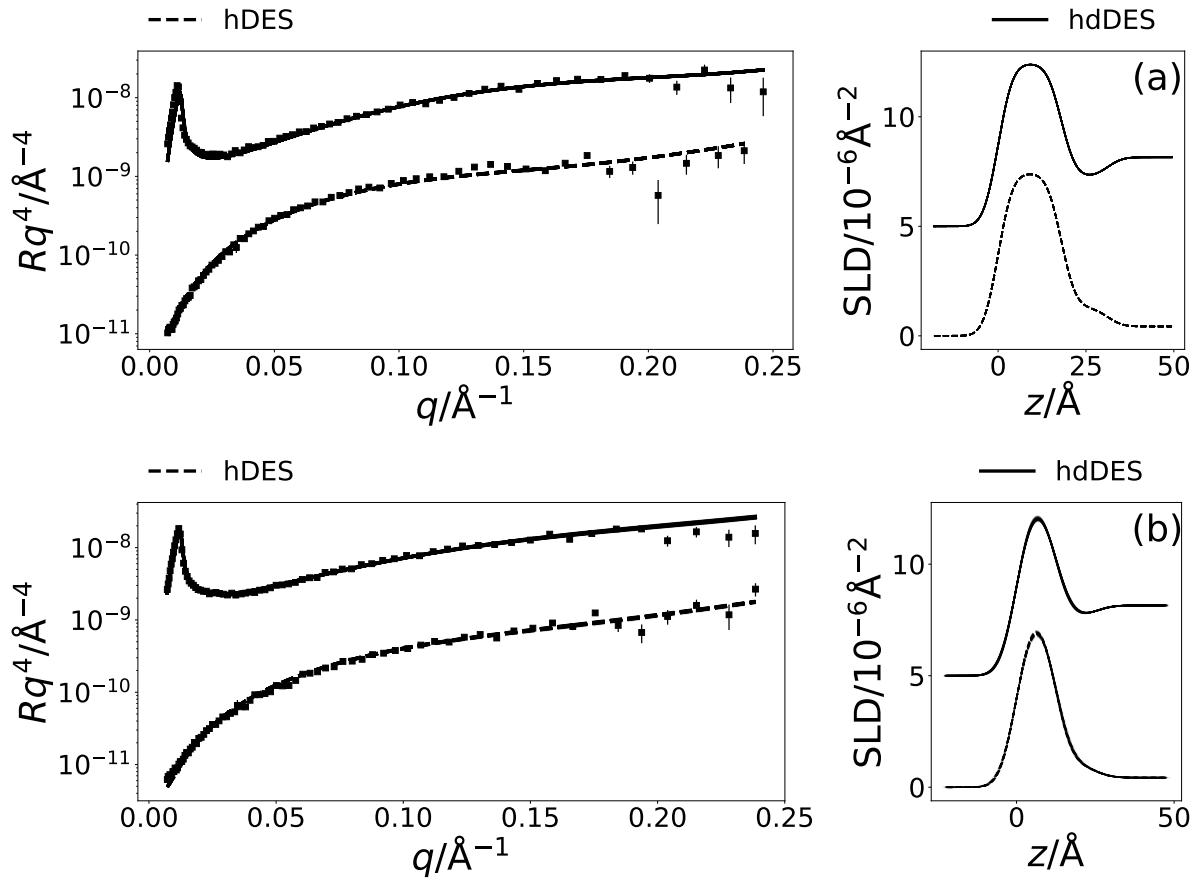

FIG. S1. The NR and SLD profiles at a surface pressure of (a) 25 mNm<sup>-1</sup> for two contrasts of DMPC, and (b) 15 mNm<sup>-1</sup> for two contrasts of DPPC. The NR profiles have been offset in the  $y$ -axis by an order of magnitude and SLD profiles offset in the  $y$ -axis by  $5 \times 10^{-6} \text{\AA}^{-2}$ , for clarity.

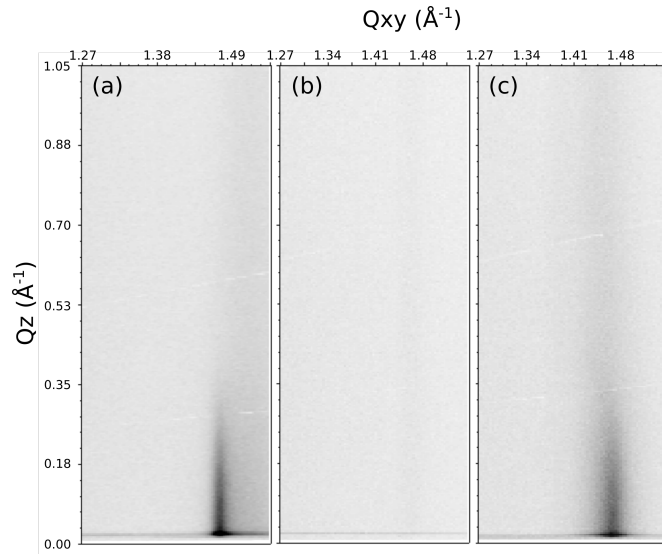

FIG. S2. The GIXD pattern for (a) DPPC at 30 mNm<sup>-1</sup> at 22 °C, (b) DMPC at 30 mNm<sup>-1</sup> at 22 °C, and (c) DMPC at 30 mNm<sup>-1</sup> at 7 °C.

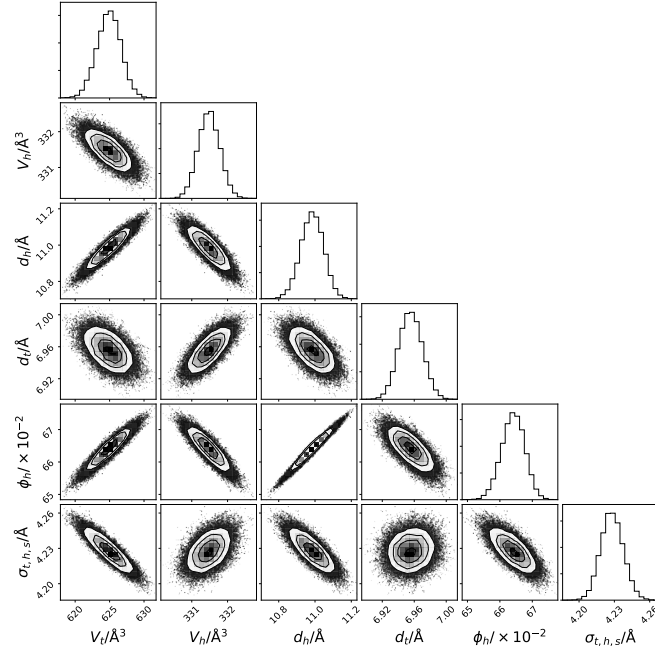

FIG. S3. The multi-parameter PDFs for the chemically-consistent model of DLPC X-ray reflectometry data at  $20 \text{ mN m}^{-1}$ .

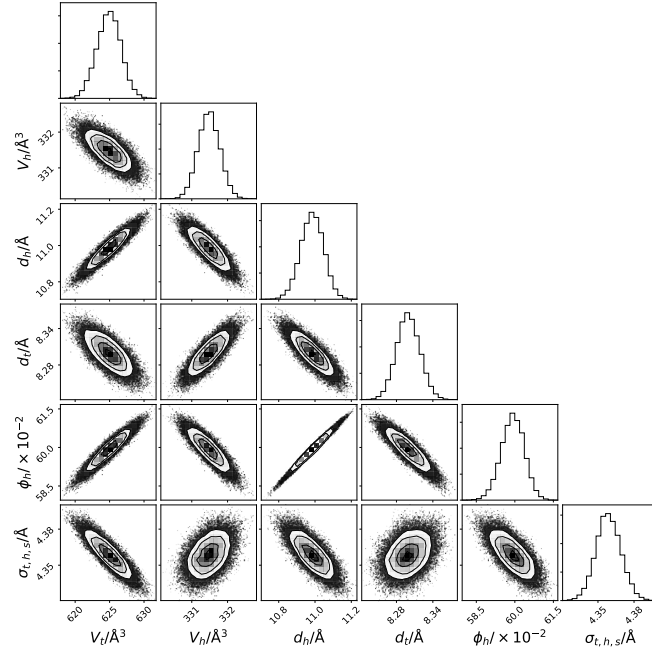

FIG. S4. The multi-parameter PDFs for the chemically-consistent model of DLPC X-ray reflectometry data at  $25 \text{ mN m}^{-1}$ .

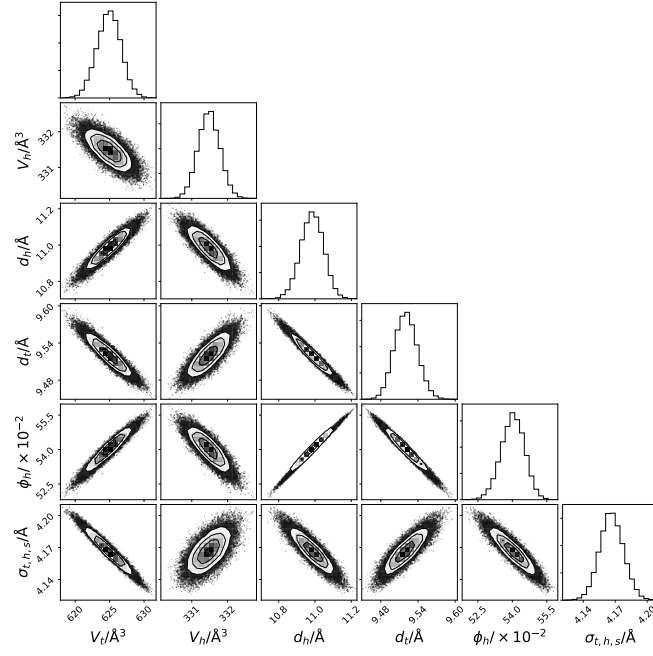

FIG. S5. The multi-parameter PDFs for the chemically-consistent model of DLPC X-ray reflectometry data at  $30 \text{ mN m}^{-1}$ .

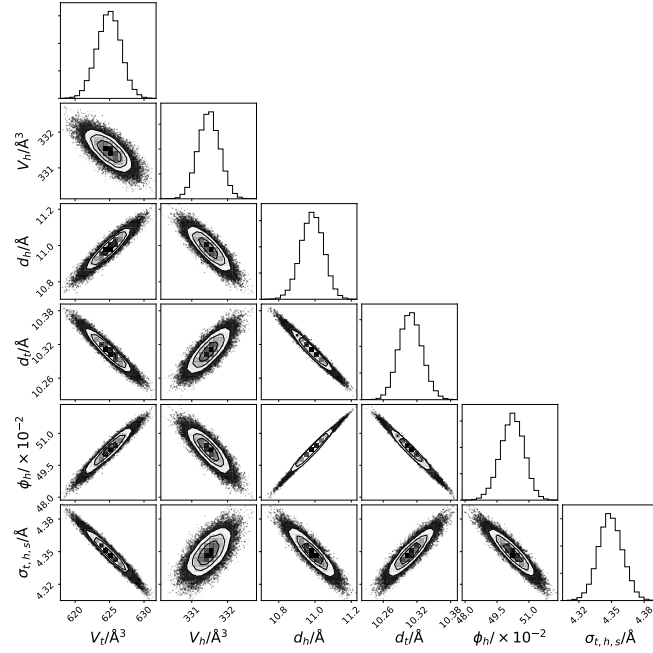

FIG. S6. The multi-parameter PDFs for the chemically-consistent model of DLPC X-ray reflectometry data at  $35 \text{ mN m}^{-1}$ .

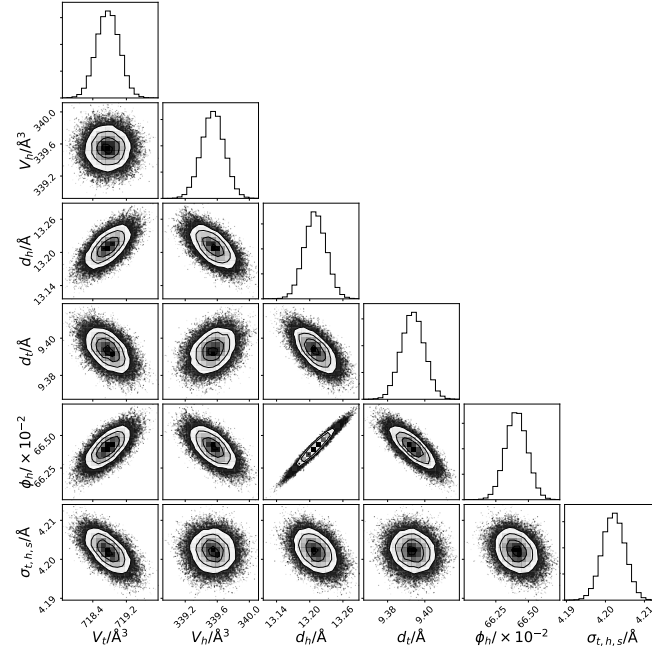

FIG. S7. The multi-parameter PDFs for the chemically-consistent model of DMPC X-ray reflectometry data at 20 mN m<sup>-1</sup>.

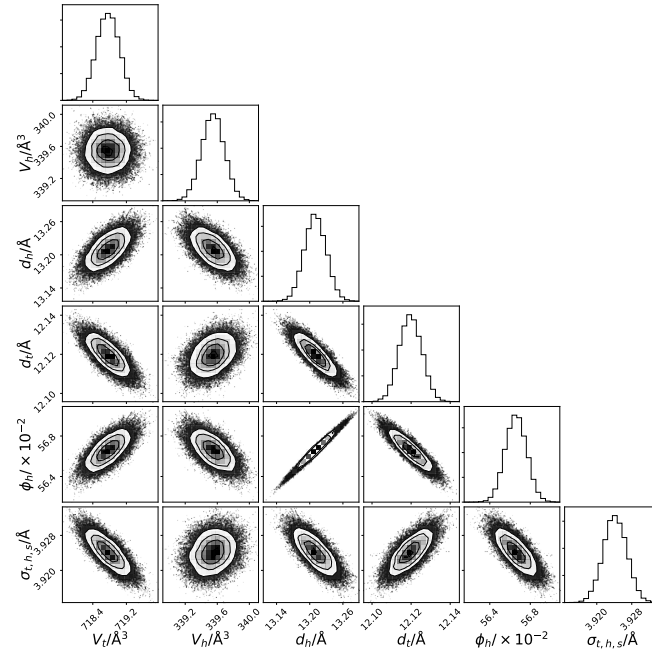

FIG. S8. The multi-parameter PDFs for the chemically-consistent model of DMPC X-ray reflectometry data at 25 mN m<sup>-1</sup>.

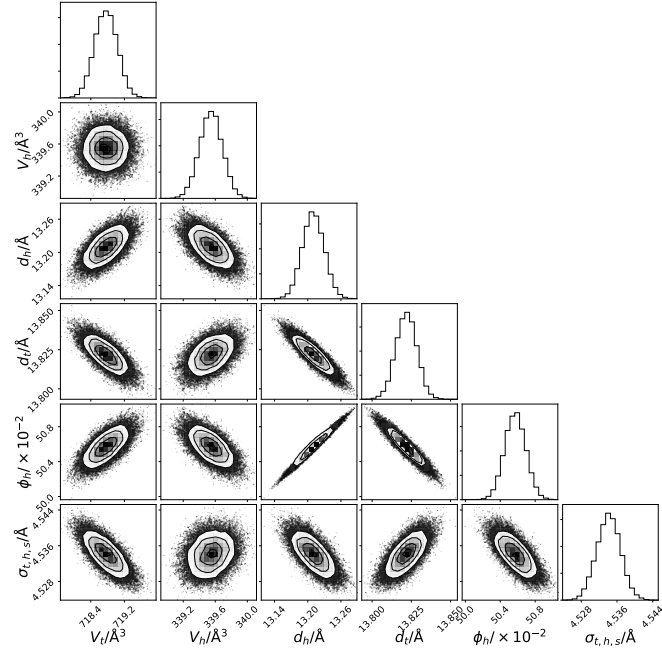

FIG. S9. The multi-parameter PDFs for the chemically-consistent model of DMPC X-ray reflectometry data at  $40 \text{ mN m}^{-1}$ .

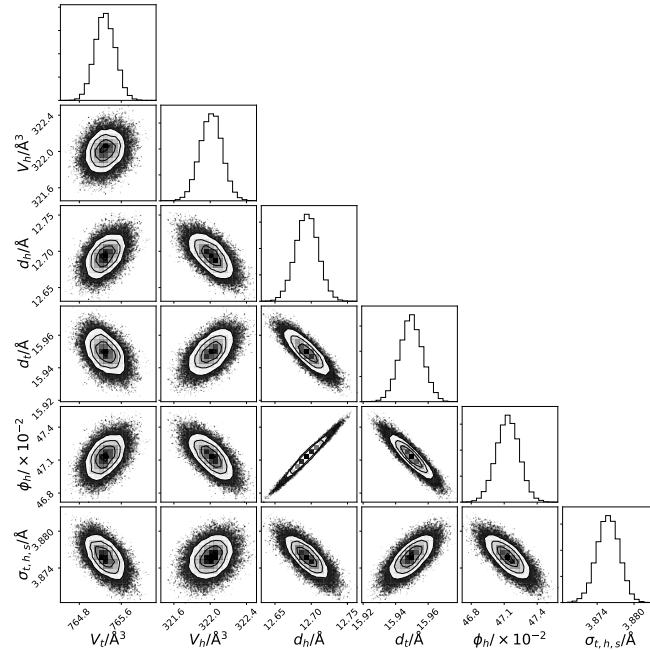

FIG. S10. The multi-parameter PDFs for the chemically-consistent model of DPPC X-ray reflectometry data at  $15 \text{ mN m}^{-1}$ .



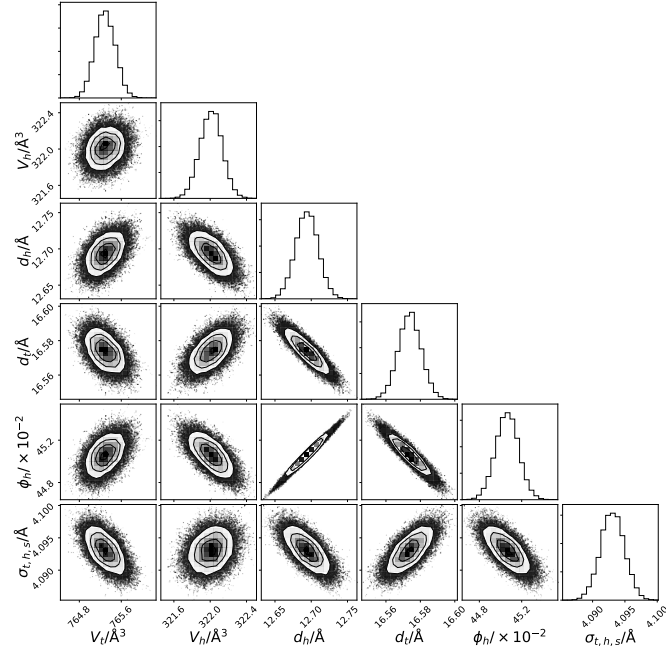

FIG. S11. The multi-parameter PDFs for the chemically-consistent model of DPPC X-ray reflectometry data at  $20 \text{ mN m}^{-1}$ .

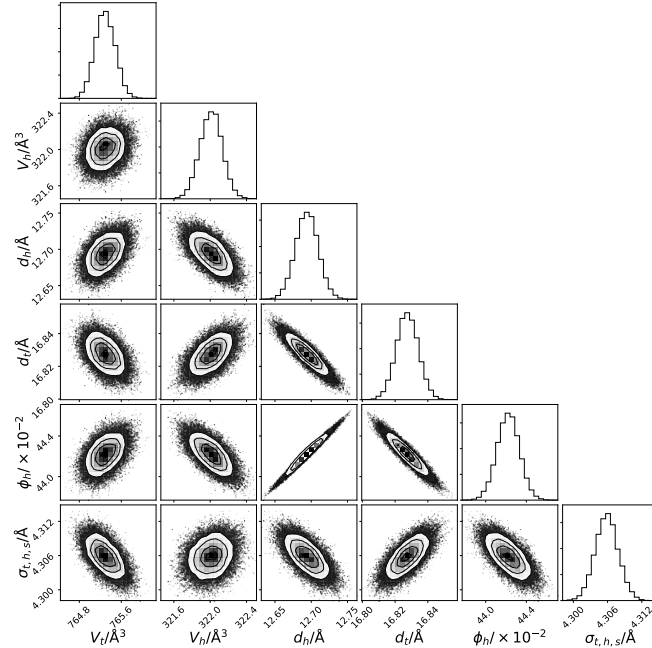

FIG. S12. The multi-parameter PDFs for the chemically-consistent model of DPPC X-ray reflectometry data at  $25 \text{ mN m}^{-1}$ .

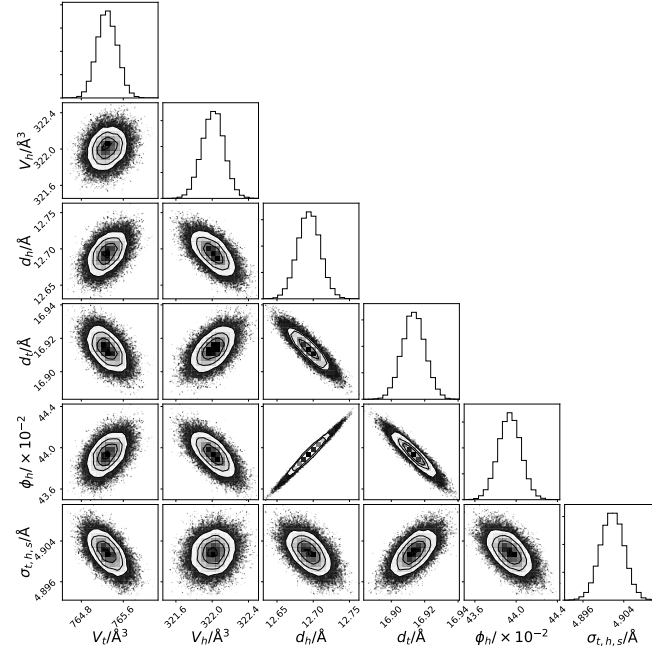

FIG. S13. The multi-parameter PDFs for the chemically-consistent model of DPPC X-ray reflectometry data at  $30 \text{ mN m}^{-1}$ .

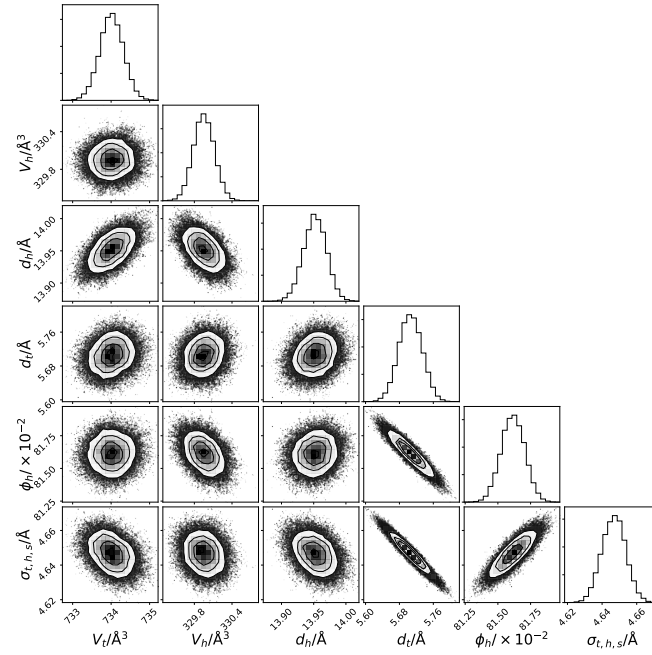

FIG. S14. The multi-parameter PDFs for the chemically-consistent model of DMPG X-ray reflectometry data at  $15 \text{ mN m}^{-1}$ .

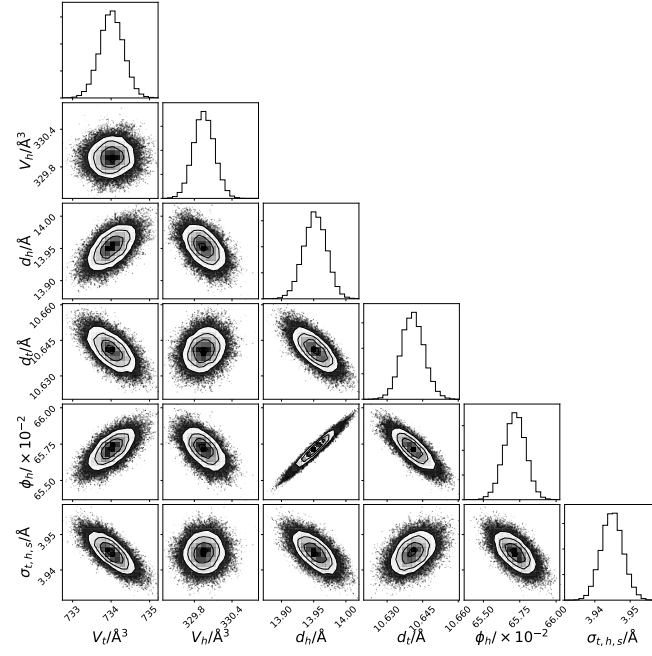

FIG. S15. The multi-parameter PDFs for the chemically-consistent model of DMPG X-ray reflectometry data at  $20 \text{ mN m}^{-1}$ .

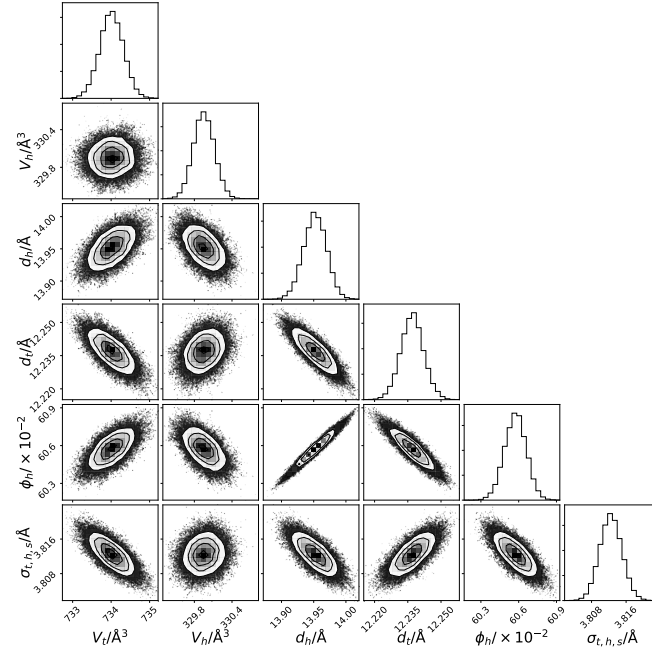

FIG. S16. The multi-parameter PDFs for the chemically-consistent model of DMPG X-ray reflectometry data at  $25 \text{ mN m}^{-1}$ .

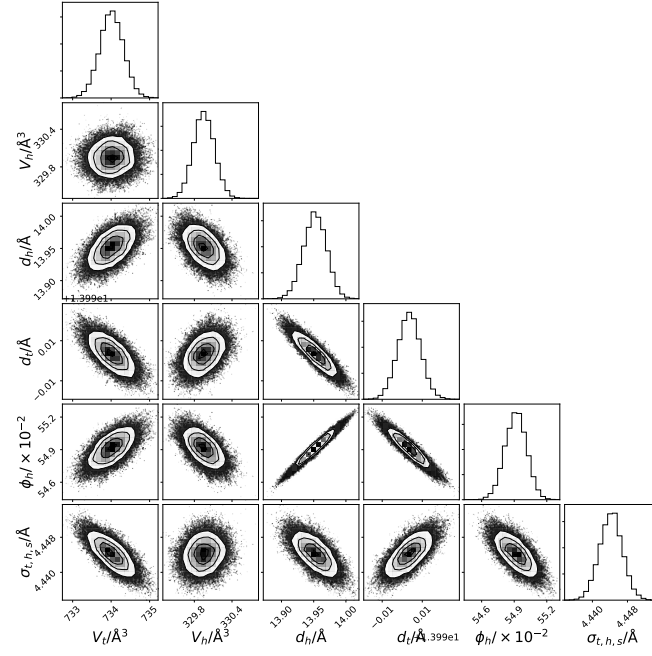

FIG. S17. The multi-parameter PDFs for the chemically-consistent model of DMPG X-ray reflectometry data at  $30 \text{ mN m}^{-1}$ .

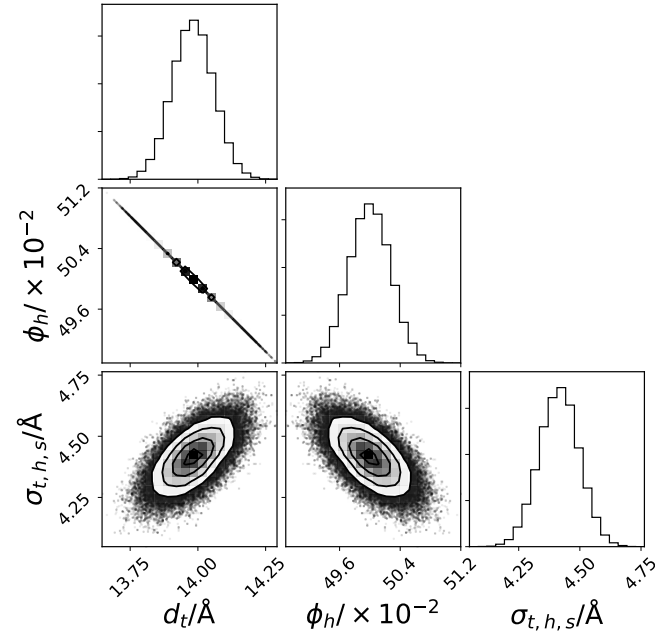

FIG. S18. The multi-parameter PDFs for the chemically-consistent model of two contrast DMPC neutron reflectometry data at  $20 \text{ mN m}^{-1}$ .

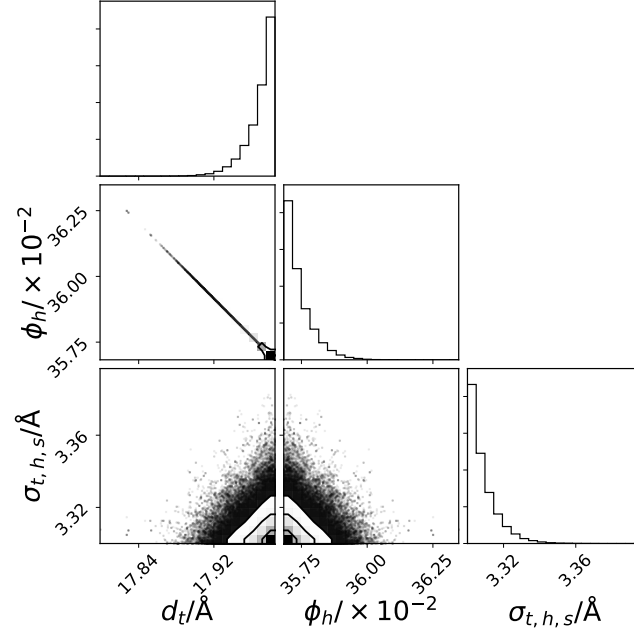

FIG. S19. The multi-parameter PDFs for the chemically-consistent model of two contrast DMPC neutron reflectometry data at  $25 \text{ mN m}^{-1}$ .

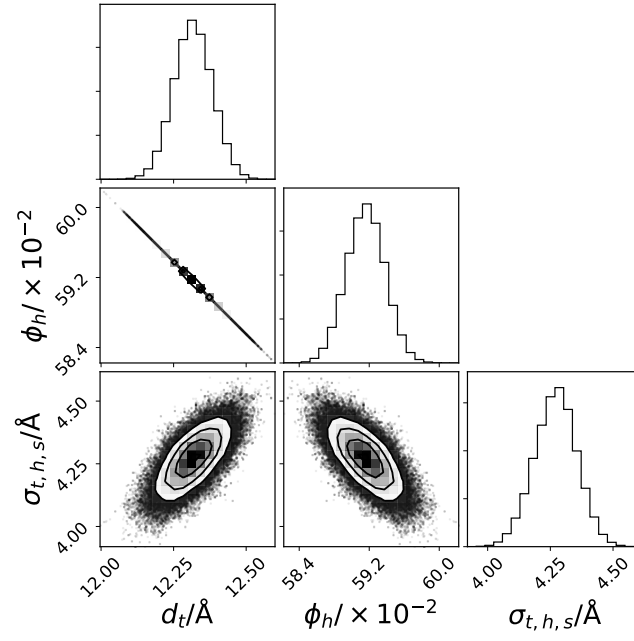

FIG. S20. The multi-parameter PDFs for the chemically-consistent model of two contrast DPPC neutron reflectometry data at  $15 \text{ mN m}^{-1}$ .

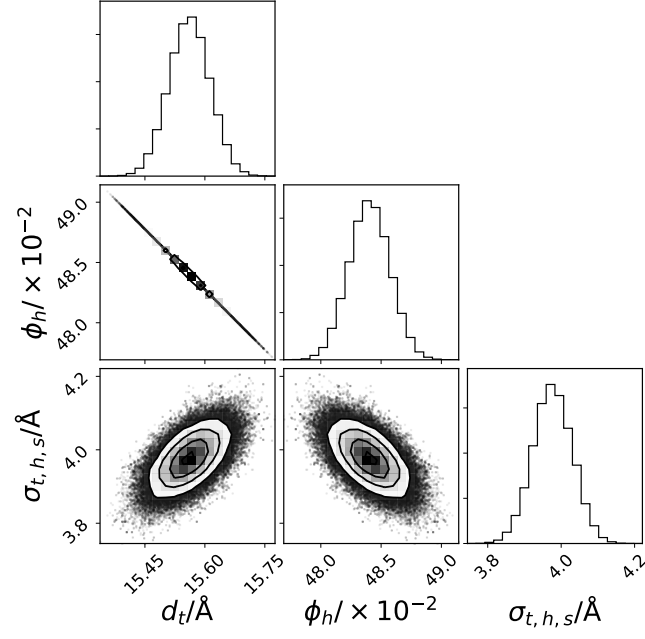

FIG. S21. The multi-parameter PDFs for the chemically-consistent model of two contrast DMPC neutron reflectometry data at  $20 \text{ mN m}^{-1}$ .

- 
- [1] E. B. Watkins, C. E. Miller, D. J. Mulder, T. L. Kuhl and J. Majewski, *Phys. Rev. Lett.*, 2009, **102**, 238101–238104.
